# Supplementary material for: A facile approach to create sensitive and selective Cu( ii ) sensors on carbon fiber microelectrodes
Source: Royal Society of Chemistry journal article supplement (doi:10.1039/d3ra05119f), 2023-01-01
Supplement: d3ra05119f1.pdf [file d3ra05119f1.pdf]

## Supplementary information

### A facile approach to create sensitive and selective Cu(II) sensors on carbon fiber microelectrodes

Uma Nudurupati,<sup>a</sup> Terdha Narla<sup>b</sup>, David Punihaole<sup>a,c</sup>, Yangguang Ou<sup>a,c\*</sup>

- a. Department of Chemistry, University of Vermont.
- b. Department of Pharmacology, University of Vermont
- c. Pipeline Investigator in Vermont Centre for Cardiovascular and Brain Health, University of Vermont

\*Corresponding author

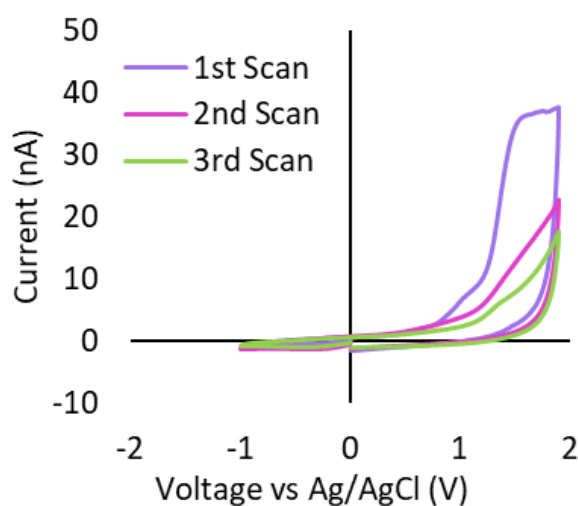

**Figure S1** Representative CV recorded during electrodeposition of DEB on carbon fiber. The characteristic peak attributed to the alkynyl radical is observed between 1.5 – 1.9 V vs Ag/AgCl. Over subsequent scans the current for this peak is decreasing.

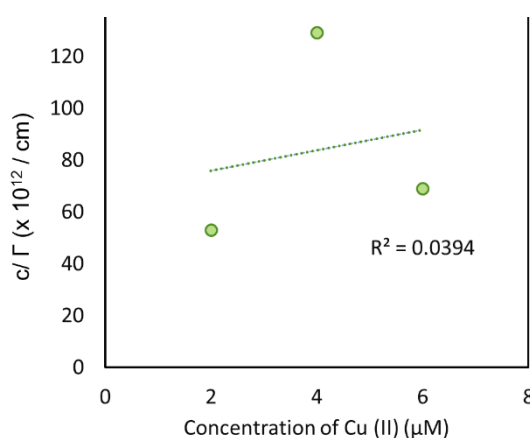

**Figure S2** Cu(II) Linearized adsorption isotherm for 3-Scan DEB coated carbon fiber micro electrode shows a poor fit, in congruence with the heterogeneous surface seen in the SEM in figure 3(c).

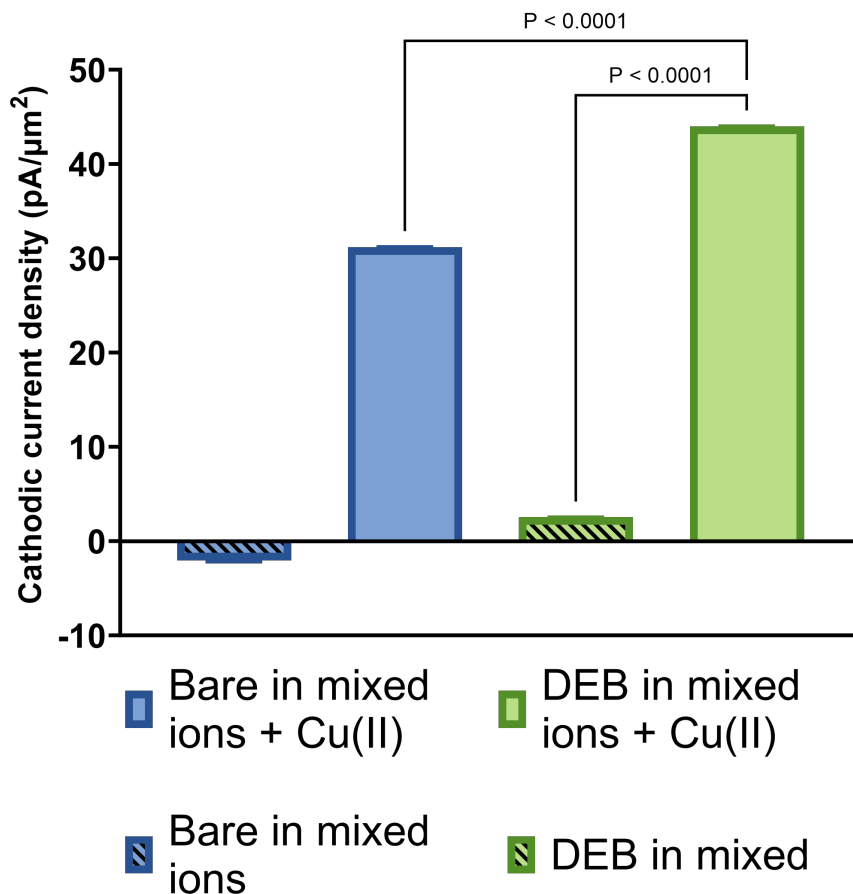

**Figure S3.** Plot of cathodic current density for either bare or 3-scan DEB modified electrodes responding to either mixed metal ions alone (solid color) or mixed metals with Cu(II) (striped color).

(a)

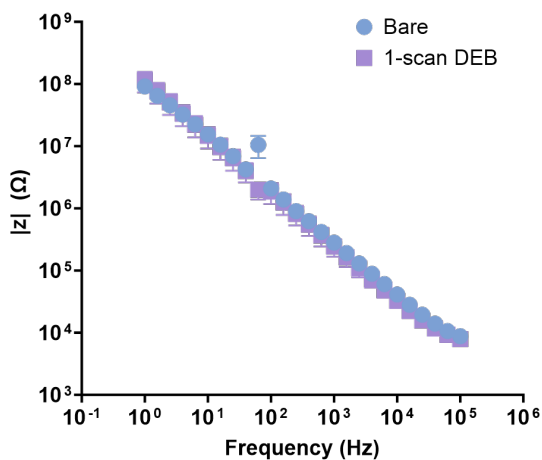

(b)

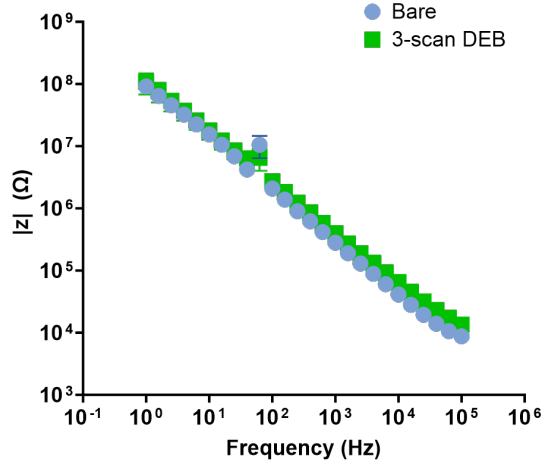

**Figure S4.** Bode plots (not normalized to surface area) comparing and contrasting (a) bare (blue) with 1-scan DEB coated carbon fiber microelectrodes (purple) and (b) bare (blue) with 3-scan DEB coated carbon fiber microelectrodes (green).
